# Supplementary material for: Nitrogen-rich organic soils under warm well-drained conditions are global nitrous oxide emission hotspots
Source: PubMed Central journal article supplement (PMC5859301; doi:10.1038/s41467-018-03540-1), 2018-03-19
Supplement: 41467_2018_3540_MOESM1_ESM.pdf [file 41467_2018_3540_MOESM1_ESM.pdf]

**Supplementary Information for Pärn et al. „Nitrogen-rich organic soils under warm well-drained conditions are global nitrous oxide emission hotspots“**

**Supplementary Table 1.** Average  $\pm$  standard error N<sub>2</sub>O emission from organic soils of the world,  $\mu\text{g N}_2\text{O-N m}^{-2} \text{h}^{-1}$ , according to drainage class and Köppen climate group. A, tropical; C, temperate; D, boreal.

|                | <b>A</b>       | <b>C</b>        | <b>D</b>        |
|----------------|----------------|-----------------|-----------------|
| <b>Natural</b> | 14.2 $\pm$ 2.4 | 0.87 $\pm$ 0.22 | 0.72 $\pm$ 0.49 |
| <b>Drained</b> | 165 $\pm$ 15   | 18.0 $\pm$ 2.5  | 27.3 $\pm$ 4.3  |

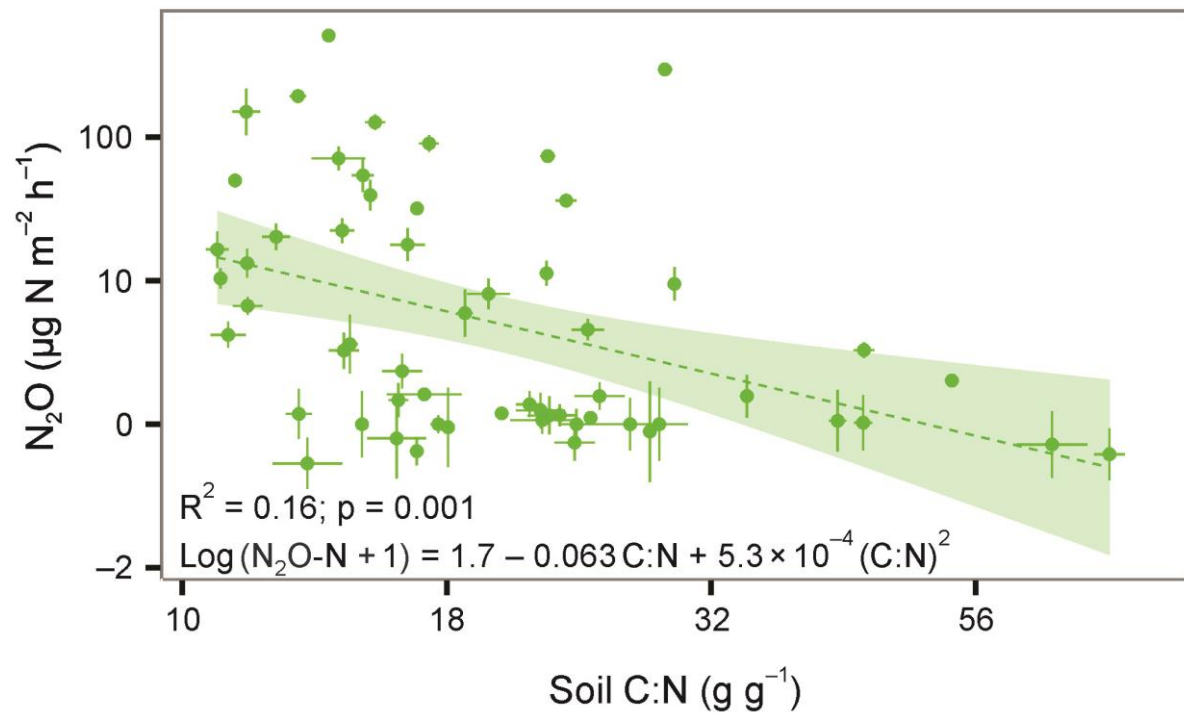

**Supplementary Fig. 1.** Relationship between site-mean N<sub>2</sub>O fluxes  $\pm$  s.e.m. and C:N ratio.

N=58.
