# Supplementary material for: Nitrogen-rich organic soils under warm well-drained conditions are global nitrous oxide emission hotspots
Source: PubMed Central journal article supplement (PMC5859301; doi:10.1038/s41467-018-03540-1), 2018-03-19
Supplement: 41467_2018_3540_MOESM3_ESM.pdf [file 41467_2018_3540_MOESM3_ESM.pdf]

## **Description of Additional Supplementary Files**

File Name: Supplementary Data 1

Description: Locations, dates, measurements of soil chemistry and physics, and N<sub>2</sub>O fluxes used in the analyses.
